# Supplementary material for: In Silico Designed Multi-Epitope Immunogen “Tpme-VAC/LGCM-2022” May Induce Both Cellular and Humoral Immunity against Treponema pallidum Infection
Source: MDPI journal article supplement (doi:10.3390/vaccines10071019), 2022-06-25

## Supporting information

**Supplementary Table S1.** List of *Treponema pallidum* proteins selected for analysis.

|    | NCBI ID        | GENE ID        | PREDICTED LOCATION | PROTEIN NAME                                 | PREDICTED FUNCTION                                                              |
|----|----------------|----------------|--------------------|----------------------------------------------|---------------------------------------------------------------------------------|
| 1  | WP_010882178.1 | TP_0733        | SEC                | Outer membrane beta-barrel protein           | OprG/OmpW-like ion-channel involved in transport of small hydrophobic molecules |
| 2  | WP_014342713.1 | FA889_00665    | PSE                | Hypothetical protein                         | Outer membrane protein/outer membrane enzyme PagP, beta-barrel domain           |
| 3  | WP_010881878.1 | TP_0430 / ntpK | MEM                | ATP synthase subunit K                       | Proton transmembrane transporter activity                                       |
| 4  | WP_010882306.1 | TP_0862 / slyD | PSE                | FKBP-type peptidyl-prolyl isomerase          | Peptidyl-prolyl cis-trans isomerase activity                                    |
| 5  | WP_010881883.1 | TP_0435 / nlpE | SEC                | Copper resistance protein NlpE               | Copper resistance associated lipoprotein                                        |
| 6  | WP_010882040.1 | TP_0594        | PSE                | DUF2147 domain-containing protein            | Hypothetical conserved protein                                                  |
| 7  | WP_010882416.1 | TP_0972 / ftr1 | MEM                | FTR1 family iron permease                    | Iron ion transmembrane transporter activity                                     |
| 8  | WP_010881498.1 | TP_0049        | PSE                | M23 family metallopeptidase                  | M23 domain-containing metallopeptidase                                          |
| 9  | WP_010882004.1 | TP_0557        | SEC                | DUF1007 family protein                       | ABC-type uncharacterized transport system, periplasmic component                |
| 10 | WP_010881746.1 | TP_0297        | SEC                | SPOR domain-containing protein               | Hypothetical protein containing a peptidoglycan binding domain                  |
| 11 | WP_010882234.1 | TP_0789        | SEC                | Outer membrane lipoprotein-sorting protein   | Outer membrane lipoprotein-sorting                                              |
| 12 | WP_014342788.1 | TP_0326 / BamA | SEC                | Outer membrane protein assembly factor BamA  | Outer membrane beta-barrel assembly factor                                      |
| 13 | WP_010881537.1 | TP_0088        | PSE                | Hypothetical protein                         | Hypothetical protein                                                            |
| 14 | WP_010881771.1 | TP_0323        | MEM                | ABC transporter permease                     | Ribose/Galactose transmembrane transporter activity                             |
| 15 | WP_010881783.1 | TP_0335        | MEM                | CPBP family intramembrane metalloprotease    | Metalloendopeptidase activity                                                   |
| 16 | AAC65118.1     | TP_0126        | MEM                | Predicted coding region TP0126               | OmpW-like ion-channel involved in transport of small hydrophobic molecules      |
| 17 | WP_010882196.1 | TP_0751        | PSE                | Vascular adhesion/metalloprotease pallilysin | Vascular adhesin/metalloprotease                                                |
| 18 | AAF45140.1     | tprK           | CYT                | Tpr protein K                                | <i>T. pallidum</i> repeat protein                                               |

**Supplementary Table S2.** Predicted IFN-gamma inducing epitopes. 69 MHC-II epitopes capable to induce IFN-gamma (positive) were predicted using the IFNepitope server hybrid method (MERCİ and SVM) default parameters.

| Epitope sequence    | Method | Result   | Score |
|---------------------|--------|----------|-------|
| GTPQNITDLCAEYHN     | MERCİ  | POSITIVE | 1     |
| TPQNITDLCAEYHNT     | MERCİ  | POSITIVE | 1     |
| PQNITDLCAEYHNTQ     | MERCİ  | POSITIVE | 1     |
| QNITDLCAEYHNTQI     | MERCİ  | POSITIVE | 1     |
| NITDLCAEYHNTQIH     | MERCİ  | POSITIVE | 1     |
| ITDLCAEYHNTQIHT     | MERCİ  | POSITIVE | 1     |
| TDLCAEYHNTQIHTL     | MERCİ  | POSITIVE | 1     |
| NDKIFSYTESLAGKR     | MERCİ  | POSITIVE | 1     |
| DKIFSYTESLAGKRE     | MERCİ  | POSITIVE | 1     |
| KIFSYTESLAGKREM     | MERCİ  | POSITIVE | 1     |
| IFSYTESLAGKREMA     | MERCİ  | POSITIVE | 1     |
| FSYTESLAGKREMAI     | MERCİ  | POSITIVE | 1     |
| SYTESLAGKREMAII     | MERCİ  | POSITIVE | 1     |
| YTESLAGKREMAIIT     | MERCİ  | POSITIVE | 1     |
| EYAFAAYAVHALWNA     | MERCİ  | POSITIVE | 1     |
| FVLGPGPGVHALWNA     | MERCİ  | POSITIVE | 1     |
| PGPGGIVSFDFFFDA     | MERCİ  | POSITIVE | 1     |
| FFFDAAMVYGPGPGG     | MERCİ  | POSITIVE | 1     |
| AAMVYGPGPGGQKW<br>T | MERCİ  | POSITIVE | 1     |
| AMVYGPGPGGQKWT<br>Y | MERCİ  | POSITIVE | 1     |
| MVYGPGPGGQKWTY<br>E | MERCİ  | POSITIVE | 1     |
| VYGPGGGQKWTYE<br>L  | MERCİ  | POSITIVE | 1     |
| YGPGGGQKWTYELY      | MERCİ  | POSITIVE | 1     |
| GPGPGGQKWTYELYL     | MERCİ  | POSITIVE | 1     |
| PGPGGQKWTYELYLE     | MERCİ  | POSITIVE | 1     |
| PGGQKWTYELYLEIL     | MERCİ  | POSITIVE | 1     |
| GGQKWTYELYLEILQ     | MERCİ  | POSITIVE | 1     |

|                      |       |          |           |
|----------------------|-------|----------|-----------|
| GQKWTYELYLEILQK      | MERCI | POSITIVE | 1         |
| QKWTYELYLEILQKG      | MERCI | POSITIVE | 1         |
| TLFAGAAGAGPGPGG      | SVM   | POSITIVE | 1,0027957 |
| AAVLAAYRAVRTLLI      | SVM   | POSITIVE | 1,021854  |
| SVALFYAYAAAYAAAA     | SVM   | POSITIVE | 1,0643286 |
| AAAYAAVTEYAFAAAY     | SVM   | POSITIVE | 1,084482  |
| HAIAAISMANEAAAK      | SVM   | POSITIVE | 1,0846252 |
| LFAGAAGAGPGPGGG      | SVM   | POSITIVE | 1,1717537 |
| IAAYAAAVTEYAFAA      | SVM   | POSITIVE | 1,2066697 |
| AYAAAVTEYAFAYAA      | SVM   | POSITIVE | 1,2083039 |
| GAGPGPGGGGGFHLG      | SVM   | POSITIVE | 1,2582538 |
| LIIAAYAAAVTEYAF      | SVM   | POSITIVE | 1,2673741 |
| AAGAGPGPGGGGGFH      | SVM   | POSITIVE | 1,3224505 |
| YAAAVTEYAFAYAV       | SVM   | POSITIVE | 1,3276033 |
| AGAGPGPGGGGGFHL      | SVM   | POSITIVE | 1,4281056 |
| GAAGAGPGPGGGGGF      | SVM   | POSITIVE | 1,5152442 |
| FAGAAGAGPGPGGGG      | SVM   | POSITIVE | 1,5171639 |
| AGAAGAG-<br>PGPGGGGG | SVM   | POSITIVE | 1,6719466 |
| YAFAYAVHALWNAY       | MERCI | POSITIVE | 2         |
| AFAAYAVHALWNAYA      | MERCI | POSITIVE | 2         |
| FAAYAVHALWNAYAA      | MERCI | POSITIVE | 2         |
| AAAYAVHALWNAYAA      | MERCI | POSITIVE | 2         |
| AYAVHALWNAYAAH       | MERCI | POSITIVE | 2         |
| YAVHALWNAYAAHA       | MERCI | POSITIVE | 2         |
| AVHALWNAYAAHAL       | MERCI | POSITIVE | 2         |
| VHALWNA-<br>YAYHALW  | MERCI | POSITIVE | 2         |
| VLGPGPGVHALWNAY      | MERCI | POSITIVE | 2         |
| LGPVHALWNAY          | MERCI | POSITIVE | 2         |
| GPVHALWNAYAI         | MERCI | POSITIVE | 2         |
| PGVHALWNAYAIA        | MERCI | POSITIVE | 2         |
| GPVHALWNAYAIAA       | MERCI | POSITIVE | 2         |

|                 |       |          |   |
|-----------------|-------|----------|---|
| PGVHALWNAYAIAAA | MERCI | POSITIVE | 2 |
| GPGGIVSFDFFFDAA | MERCI | POSITIVE | 2 |
| GPGIVSFDFFFDAAM | MERCI | POSITIVE | 2 |
| GGIVSFDFFFDAAMV | MERCI | POSITIVE | 2 |
| GIVSFDFFFDAAMVY | MERCI | POSITIVE | 2 |
| IVSFDFFFDAAMVYG | MERCI | POSITIVE | 2 |
| VSFDFFFDAAMVYGP | MERCI | POSITIVE | 2 |
| SFDFFFDAAMVYGP  | MERCI | POSITIVE | 2 |
| FDFFFDAAMVYGP   | MERCI | POSITIVE | 2 |
| DFFFFDAAMVYGP   | MERCI | POSITIVE | 2 |
| GPGGQKWTYELYEI  | MERCI | POSITIVE | 2 |

**Supplementary Table S3: Predicted conformational B-cell epitopes.** The ElliPro server was used to predict the conformational B cell binding epitopes via the 3D structure of the *Mycoplasma pneumoniae* multi-epitope vaccine.

| Conformational epitope | Residues and position                                                                                                                                                                                                                                                                                                                                                                                                                                                                                                        | Number of residues | Score |
|------------------------|------------------------------------------------------------------------------------------------------------------------------------------------------------------------------------------------------------------------------------------------------------------------------------------------------------------------------------------------------------------------------------------------------------------------------------------------------------------------------------------------------------------------------|--------------------|-------|
| 1                      | M1, I2, K3, L4, K5, F6                                                                                                                                                                                                                                                                                                                                                                                                                                                                                                       | 6                  | 0.969 |
| 2                      | P359, G360, P361, G362, G363, M364, F365, G366, A367, A368, A369, V370, L371, G372, I373, S374, A375, V376, G377, G378, P379, G380, P381, G382, K383                                                                                                                                                                                                                                                                                                                                                                         | 25                 | 0.898 |
| 3                      | G7, V8, F9                                                                                                                                                                                                                                                                                                                                                                                                                                                                                                                   | 3                  | 0.859 |
| 4                      | R387, A388, V389, R390, T391, L392, L393, I394, I395, C396, A397, G398, P399, G400, P401, G402, V403, L404, H405, A406, A407, A408, A409, V410, T411, E412, Y413, A414, F415, V416, L417, G418, P419, G420, P421, G422, V423, H424, A425, L426, W427, N428, A429, Y430, A431, I432, A433, A434, A435, A436, R437, G438, P439, G440, P441, G442, R443, P444, A445, G446, S447, A448, T449, L450, F451, A452, G453, A454, A455, G456, A457, G458, P459, G460, P461, G462, G463, G464, G465, G466, F467, H468, L469, G470, Y471 | 85                 | 0.745 |
| 5                      | F10, T11, V12, L13, L14, S15, S16, A17, Y18, A19, H20, G21, T22, P23, Q24, N25, D28, L29, C30, A31, E32, Y33, H34, N35, T36, Q37, I38, H39, L41, D43, K44, I45, F46, S47, Y48, T49, E50, S51, L52, A53, G54, K55, R56, E57, M58, A59, I60, I61, T62, F63, K64, N65, G66, A67, T68, F69, Q70, V71, E72, V73, P74,                                                                                                                                                                                                             | 107                | 0.741 |

---

G75, S76, Q77, H78, I79,  
D80, S81, Q82, K83, K84, A85, I86, E87, R88,  
M89, K90, D91, T92, L93, R94, I95, A96, Y97, L98,  
T99, E100, A101, V103, L106, C107, V108, W109,  
N110, N111, K112, T113,  
P114, H115, A116, I117, A118, A119, I120, S121,  
M122, A123

---

**Supplementary Figure S1.** Population coverage of the alleles used in the construction of the final version of Tpme-VAC/LGCM-2022, with a total population coverage of 99.93%

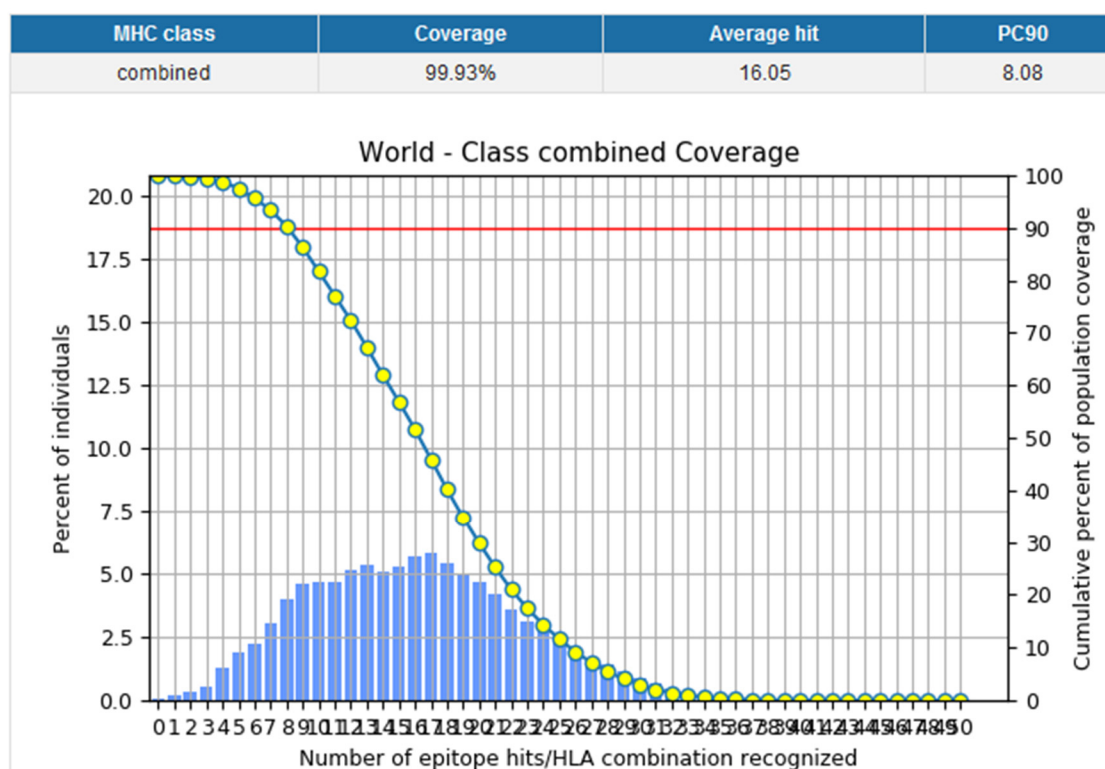

**Supplementary Figure S2.** Representation of the secondary structure of the chimeric protein. The results showed an arrangement of alpha helices (48.0%),  $\beta$ -strand (15.0%), and coil formation (37.0%).

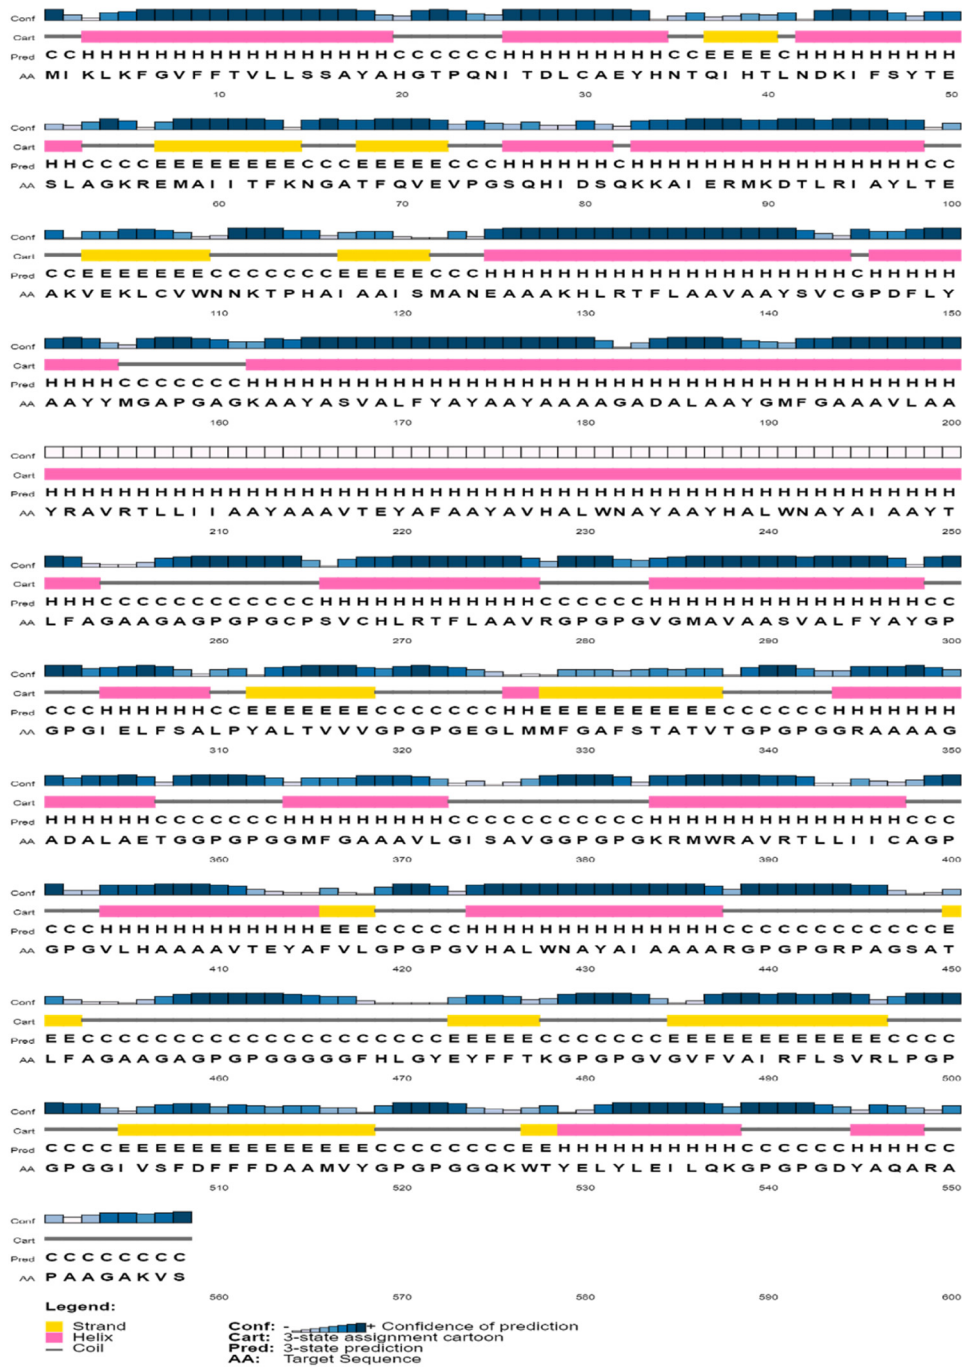

**Supplementary Figure S3.** Three-dimensional structure modelling of the chimeric protein. (A) Model predicted by RaptorX. (B) Ramachandran plot for the initial model, showing 92,9% residues in most favoured regions and 0,7% in disallowed regions.

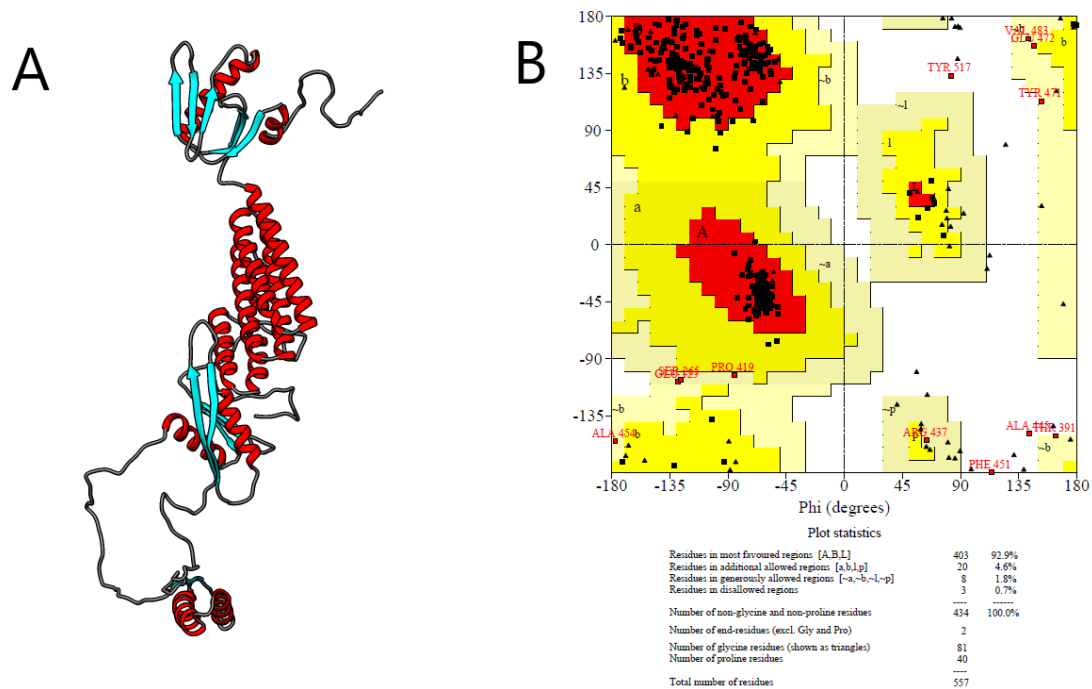

**Supplementary Figure S4.** Representation of B-lymphocyte conformational epitopes with a score above 0.7 present in the chimeric protein sequence. (Red) 6 residue epitopes, score: 0.969. (Green) 25 residue epitopes, score: 0.898. (Blue) 3 residue epitopes, score: 0.859. (Cyan) 85 residue epitopes, score: 0.745. (Purple) 107 residue epitopes, score: 0.741.

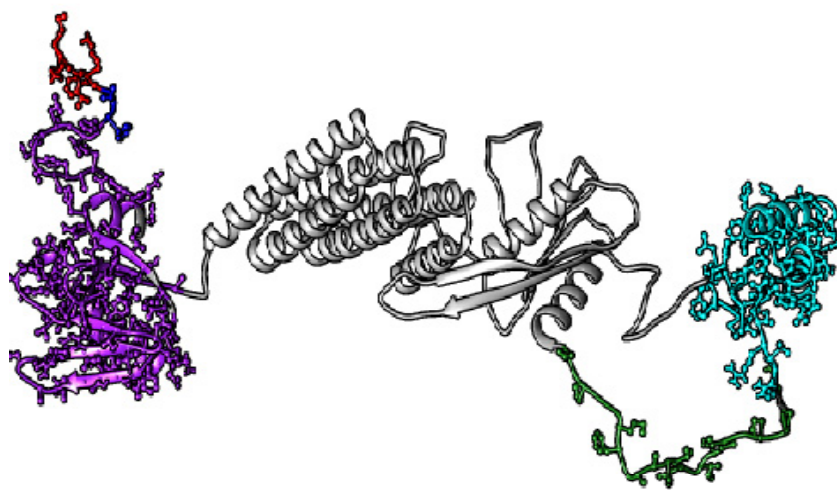

**Supplementary Figure S5.** Immuno simulation results of only the adjuvant regarding B cell population. (A) B cell population per mm<sup>3</sup> (B) PLB cell population per mm<sup>3</sup>.

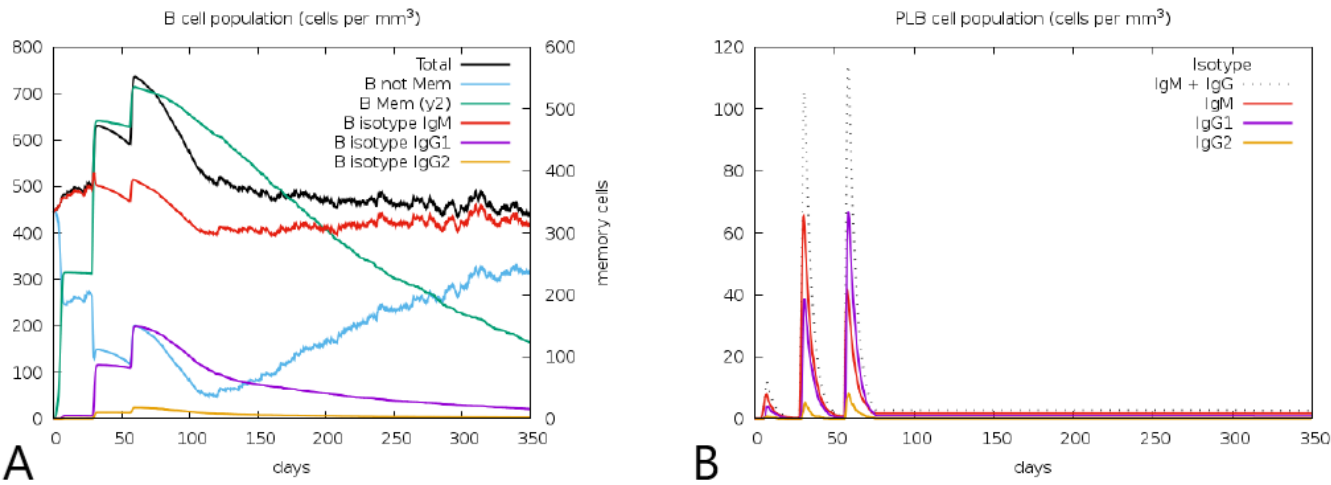

**Supplementary Figure S6.** Immuno simulation results of only the adjuvant regarding immunoglobulin production.

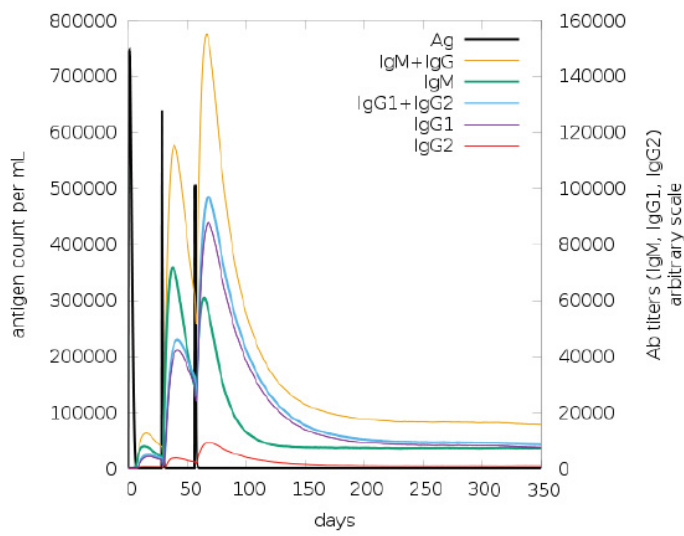



**Supplementary Figure S7.** Immuno simulation results of only the adjuvant regarding T lymphocyte populations. (A) Helper T-Cell population per state. (B) Helper T-Cell differentiation. (C) Cytotoxic T-Cell population. (D) Cytotoxic T-Cell population per state.

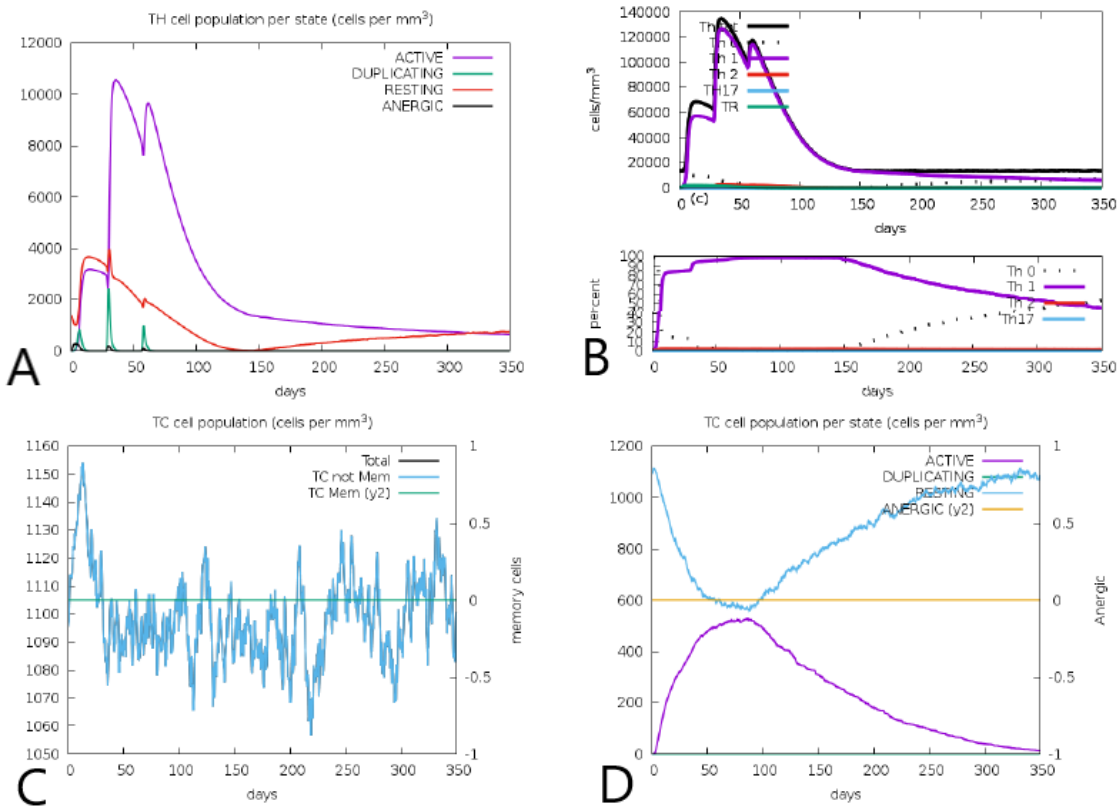

**Supplementary Figure S8.** Immuno simulation results of the chimeric protein regarding cytokine production.

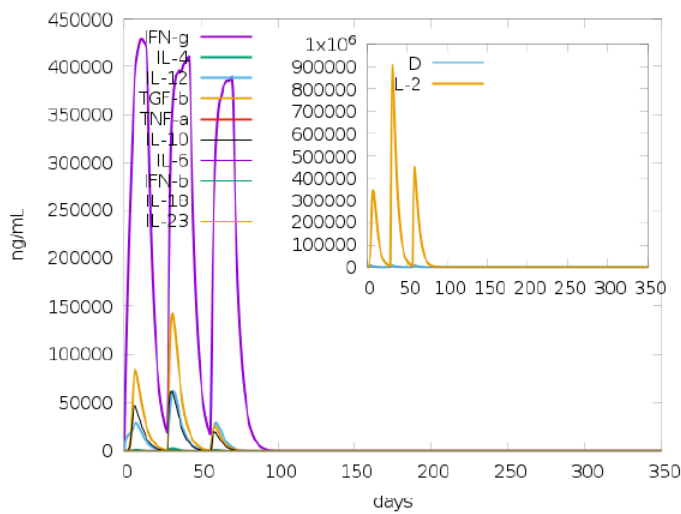

**Supplementary Figure S9.** Immuno simulation results of only the epitopes regarding B cell population. (A) B cell population per mm<sup>3</sup> (B) PLB cell population per mm<sup>3</sup>.

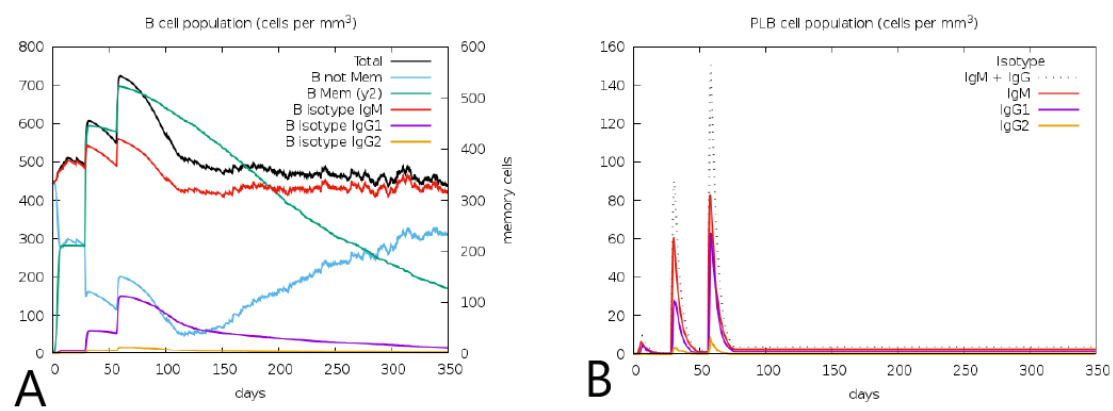

**Supplementary Figure S10.** Immuno simulation results of only the epitopes regarding immunoglobulin production.

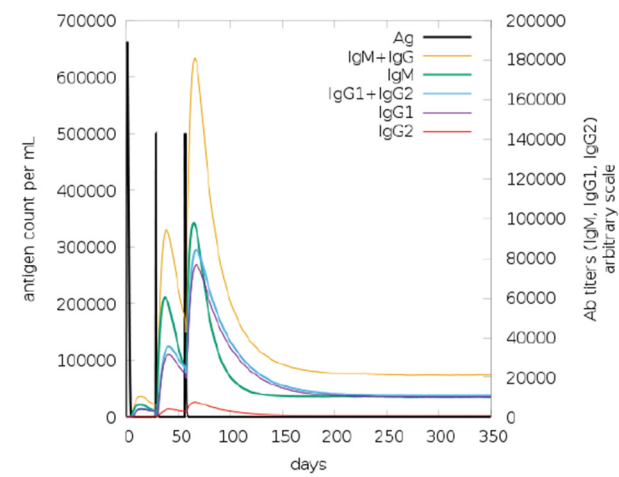

**Supplementary Figure S11.** Immuno simulation results of only the epitopes regarding T lymphocyte populations. (A) Helper T-Cell population per state. (B) Helper T-Cell differentiation. (C) Cytotoxic T-Cell population. (D) Cytotoxic T-Cell population per state.

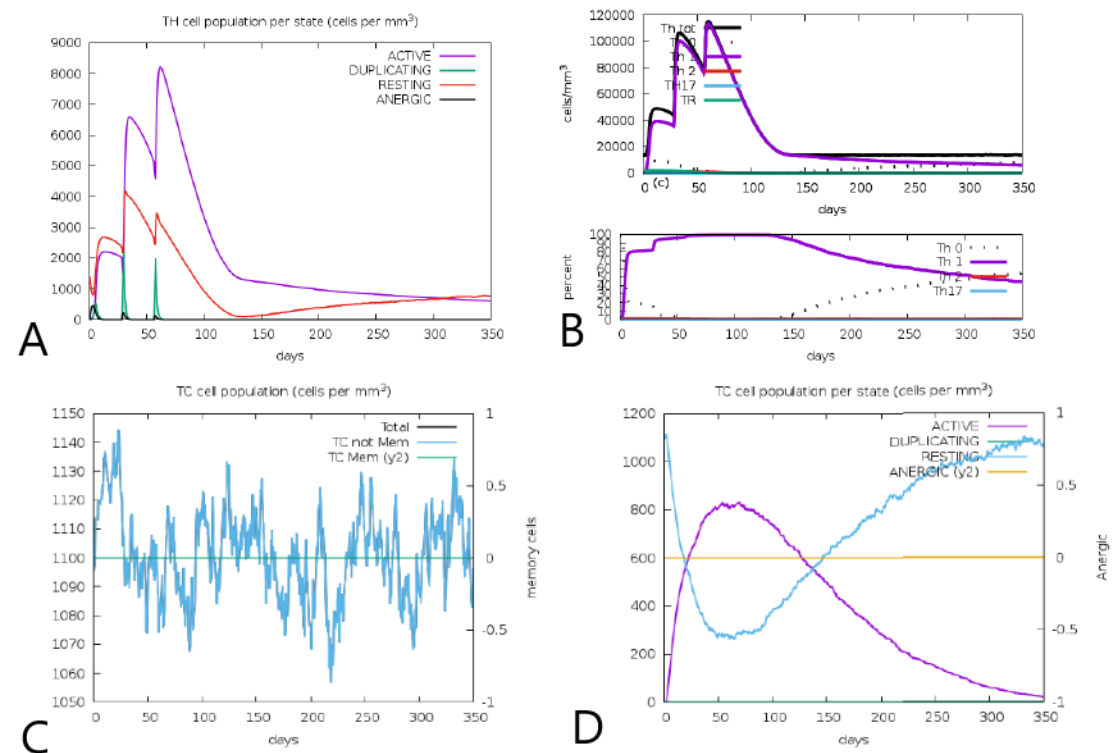

**Supplementary Figure S12.** Immuno simulation results of the chimeric protein regarding cytokine production.

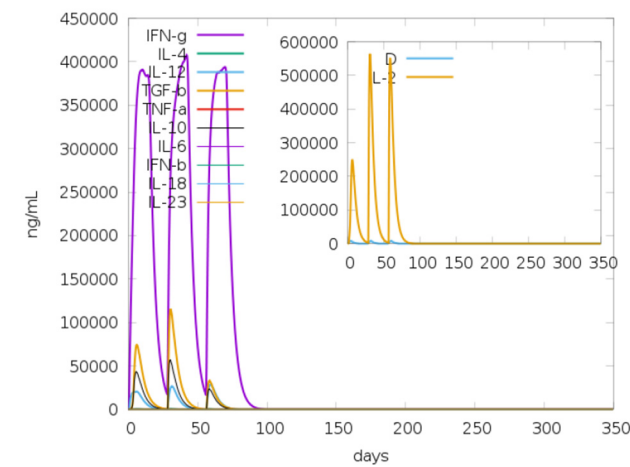

Supplement: s1 [file s1]
